1           **Seasonal plasticity in morphology and metabolism differs between**  
2           **migratory North American and resident Costa Rican monarch butterflies**

3

4   Ayşe Tenger-Trolander\*<sup>1,3</sup>, Cole R. Julick\*<sup>2</sup>, Wei Lu<sup>1</sup>, Delbert André Green<sup>3</sup>, Kristi L.  
5   Montooth<sup>2</sup>, Marcus R. Kronforst<sup>1</sup>

6   \* co-first authors contributed equally to this work

7

8   <sup>1</sup> Department of Ecology and Evolution, University of Chicago, Chicago, IL 60637

9   <sup>2</sup> School of Biological Sciences, University of Nebraska-Lincoln, Lincoln, NE 68588

10   <sup>3</sup> Ecology and Evolutionary Biology, University of Michigan, Ann Arbor, MI 48109

11

12   Corresponding Authors:

13   Kristi Montooth, 1104 T Street, Lincoln NE 68588-0188, [kmontooth2@unl.edu](mailto:kmontooth2@unl.edu);

14   Marcus Kronforst, 1101 East 57th Street, Chicago, IL 60637 [mkronforst@uchicago.edu](mailto:mkronforst@uchicago.edu)

15 **Abstract**

16 Environmental heterogeneity in temperate latitudes is expected to maintain seasonally  
17 plastic life-history strategies that include the tuning of morphologies and metabolism that  
18 support overwintering. For species that have expanded their ranges into tropical latitudes, it is  
19 unclear the extent to which the capacity for plasticity will be maintained or will erode with  
20 disuse. The migratory generations of the North American (NA) monarch butterfly *Danaus*  
21 *plexippus* lead distinctly different lives from their summer generation NA parents and their  
22 tropical descendants living in Costa Rica (CR). NA migratory monarchs postpone  
23 reproduction, travel thousands of kilometers south to overwinter in Mexico, and subsist on  
24 little food for months. Whether recently dispersed populations of monarchs such as those in  
25 Costa Rica, which are no longer subject to selection imposed by migration, retain ancestral  
26 seasonal plasticity is unclear. To investigate differences in seasonal plasticity, we reared NA  
27 and CR monarchs in summer and autumn in Illinois, USA, and measured seasonal reaction  
28 norms for aspects of morphology and metabolism related to flight. NA monarchs were  
29 seasonally plastic in forewing and thorax size, increasing wing area and thorax to body mass  
30 ratio in autumn. While CR monarchs increased thorax mass in autumn, they did not increase  
31 the area of the forewing. NA monarchs maintained similar resting and maximal flight  
32 metabolic rates across seasons. However, CR monarchs had elevated metabolic rates in  
33 autumn. Our findings suggest that the recent expansion of monarchs into habitats that support  
34 year-round breeding may be accompanied by (1) the loss of some aspects of morphological  
35 plasticity as well as (2) the underlying physiological mechanisms that maintain metabolic  
36 homeostasis in the face of temperature heterogeneity.

37

38 **Keywords**

39 Seasonal plasticity, migration phenotypes, metabolic rate, wing morphology, *Danaus*

40 *plexippus*, monarch butterfly

41 **Introduction**

42 Fluctuating seasonal environments in temperate habitats are expected to favor the  
43 evolution of overwintering strategies that are, by their nature, plastic responses to the  
44 environment (Moran 1992; Kingsolver and Huey 1998). For some species, these strategies  
45 involve changes in physiology and morphology that accompany overwintering in place, while  
46 for other species they involve physiological and morphological changes that support seasonal  
47 migration (Arnold et al. 2004; Butler and Woakes 2001). Theory for the evolutionary  
48 maintenance and loss of plasticity has been well developed (Via and Lande 1985, 1987; de  
49 Jong 1990; Van Tienderen 1991; Gomulkiewicz and Kirkpatrick 1992; Moran 1992; Gavrilets  
50 and Scheiner 1993) and there are established empirical frameworks and organismal systems  
51 for investigating the evolutionary dynamics of seasonal plasticity (Kingsolver and Huey 1998;  
52 Scheiner 1993). Trait plasticity may be lost when species ranges expand out of temperate,  
53 seasonal environments and into tropical, constant environments. This loss may occur via costs  
54 of plasticity that include a reduced efficacy of selection (Van Tienderen 1991; Kawecki 1994;  
55 Whitlock 1996; DeWitt et al. 1998; Van Dyken and Wade 2010) or genetic assimilation  
56 whereby adaptation to a new constant environment fixes the trait value (Waddington 1961;  
57 Price et al. 2003; Lande 2009; Schleicherová et al. 2013; Wan et al. 2018).

58 Trait plasticity may be a key factor enabling population persistence as environments  
59 across the globe become more variable (Catullo et al. 2019; Matesanz and Ramirez-Valiente  
60 2019; O'Connor et al. 2012; Price et al. 2003; Sgro et al. 2016), motivating a better empirical

61 understanding of how and when plasticity is lost. The loss of plasticity through assimilation,  
62 where some populations evolve a fixed phenotype that maximizes fitness in a new, stable  
63 environment (Aubret and Shine 2009; Corl et al. 2018) has been demonstrated in a handful of  
64 systems, including at a mechanistic and genetic level for wing coloration in common buckeye  
65 butterflies (van der Burg et al. 2020). A series of studies by Cooper et al. (2012, 2014)  
66 suggests that cellular membrane plasticity in phospholipid composition can be eroded through  
67 disuse or via costs of maintaining plasticity in fruit fly populations evolved in constant  
68 thermal environments. Relaxed selection at cold-acclimation genes coincides with range  
69 expansion into warmer latitudes in *Arabidopsis* (Zhen and Ungerer 2008; Zhen et al. 2011).  
70 However, seasonal plasticity is complex in that it involves suites of traits to support divergent  
71 physiologies or life histories across seasons (Williams et al. 2017; Wilsterman 2021).  
72 Investigating how this complex multi-trait plasticity is lost (e.g., piecemeal versus wholesale  
73 loss) when species ranges expand into less seasonal latitudes may provide insight into both the  
74 mechanisms of trait integration and trait loss, as well as identify aspects of seasonal plasticity  
75 that may be retained and respond to different environmental cues in the new environment.

76 North American (NA) monarch butterflies (*Danaus plexippus*) are well known for  
77 their long-distance seasonal migration plasticity that meets different dispersal, reproductive,  
78 and energetic demands across generations (Reppert and de Roode 2018). Summer generations  
79 are short-lived and reproduce shortly after adult eclosion. The autumn/winter generation lives  
80 for 8-12 months during which they migrate to their overwintering grounds in Mexico where  
81 they remain in reproductive diapause until the following spring. They then migrate back into  
82 the Southern United States and successive generations recolonize northern latitudes. In N.  
83 America, seasonally variable environmental conditions are predicted to maintain plasticity for

84 many aspects of morphology and physiology that support the different life-history strategies  
85 in summer versus autumn/winter generations. Notably, previous studies comparing summer  
86 (non-migratory) and autumn (migratory) generation monarchs have shown that NA monarchs  
87 eclose in reproductive diapause, have increased longevity and cold tolerance, greater fat  
88 stores, differences in sun compass neuropil volume, and a strong drive to fly south in autumn  
89 compared with summer-eclosing monarchs (Barker and Herman 1976; Herman and Tatar  
90 2001; Goehring and Oberhauser 2002; Brower et al. 2006; Zhu et al. 2008, 2009; Heinze et al.  
91 2013; Tenger-Trolander et al. 2019).

92 NA monarchs have expanded their range through multiple independent dispersal  
93 events into tropical latitudes that lack seasonal heterogeneity and support resident, year-round  
94 breeding populations (Zhan et al. 2014), making monarchs a good system to investigate the  
95 loss of complex multi-trait plasticity. These populations are descendants of the migratory NA  
96 population, but have lost long-distance migratory behavior and differ in two migration-  
97 relevant phenotypes – wing size and sun compass neuron tuning to sunlight (Altizer and Davis  
98 2010; Freedman et al. 2020; Nguyen et al. 2021). Today, non-migratory populations can be  
99 found in Central and South America, the Caribbean, the Iberian Peninsula, Morocco, the  
100 Pacific Islands, Australia, and New Zealand (Zhan et al. 2014; Pfeiler et al. 2017). In  
101 Australia, there are both migratory and non-migratory populations that exhibit plasticity in  
102 reproductive development (James 1984; Dingle et al. 1999; Freedman et al. 2018), suggesting  
103 that some aspects of seasonal migration plasticity may be maintained within some dispersed  
104 populations.

105 Here, we quantified plasticity across generations in NA monarchs for wing morphology  
106 and metabolic traits that are related to long-distance migration, and then asked whether Costa

107 Rican (CR) monarch butterflies have lost or decreased plasticity in these traits (Figure 1). Using  
 108 a common garden experiment with seasonal rearing of NA and CR monarchs, we tested the  
 109 prediction that migratory populations have greater plasticity in response to seasonal rearing  
 110 conditions than do non-migratory populations that no longer experience temperate-latitude  
 111 seasonality in temperature, day length, and host-plant availability (Figure 1).

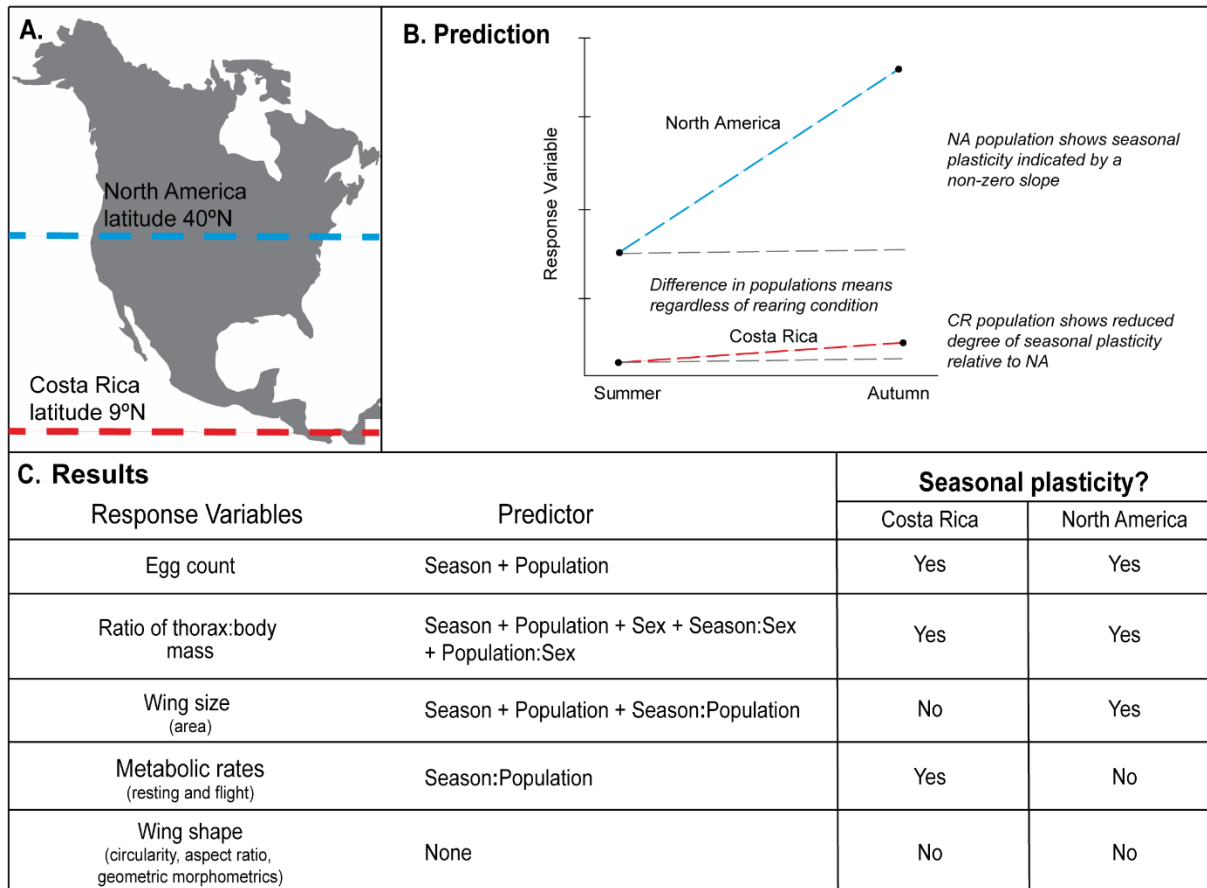

112

113 **Figure 1.** Summary of the experiment, predictions, and main findings investigating seasonal  
 114 plasticity in Costa Rican (CR) and North American (NA) monarchs. A) Map of North and  
 115 Central America indicating NA (blue) and CR (red) monarch respective latitudes. B) Prediction  
 116 and potential outcomes of a possible response variable (i.e., a trait). Populations may differ in  
 117 trait value regardless of seasonal rearing condition. Populations may also differ in seasonal trait  
 118 plasticity. A non-zero reaction norm between summer and autumn trait values within a  
 119 population indicates the presence of seasonal plasticity (blue and red vs grey lines), and  
 120 differences in reaction norm between populations indicate differences in degree of plasticity  
 121 (different slope of blue and red line). C) List of traits measured in this study, the independent

122 variables (population, rearing season, and sex) that explained significant variance in the trait,  
123 and whether each population exhibited seasonal trait plasticity.

## 124 **Methods**

### 125 *Trait Selection*

126 We selected physiological and morphological traits that are likely subject to different  
127 selective pressures depending upon seasonal environmental heterogeneity, including egg  
128 count, thorax and abdomen mass, wing size, wing shape, and metabolic rate. Plasticity in  
129 these traits is thought to impact monarch success in reproduction, migration and  
130 overwintering. We counted the number of mature oocytes as a measure of reproductive arrest,  
131 a well-known phenomenon in migrating NA monarchs that is correlated with their longevity  
132 and overwintering strategy (Barker and Herman 1976; Goehring and Oberhauser 2002). We  
133 measured resting and maximal flight metabolic rates to quantify plasticity in energy demand  
134 that supports adult maintenance and flight. We massed the thorax and abdomen separately to  
135 estimate mass associated with the flight muscles and with the reproductive organs and fat  
136 body respectively. We measured forewing size and shape as traits associated with flight  
137 efficiency. Larger wings generate more lift due to lower wing loading, and more narrow  
138 wings with high aspect ratios decrease drag. (Winkler and Leisler 1992; Senar et al. 1994;  
139 Lockwood et al. 1998; Swaddle and Witter 1998; Dudley 2000; Egbert and Belthoff 2003;  
140 Wang 2004).

### 141 *Seasonal rearing*

142 We reared two generations (summer and autumn) of NA and CR monarch butterflies  
143 outdoors in Chicago, IL in 2016 and 2017. Rearing was done under permits from USDA-  
144 APHIS. Butterflies that emerged in July and August were designated as the summer

145 generation and those that emerged in September and October were designated as the autumn  
146 generation. In both years, the autumn generation were the offspring of the summer generation.  
147 In 2016, we measured metabolic traits in female and male adult monarchs and counted the  
148 number of mature oocytes in the females. We repeated these measurements for monarchs  
149 reared in 2017, with the addition of morphological measurements, including body mass,  
150 forewing size, and forewing shape.

### 151 *Sample sizes*

152 We reared 576 monarchs (149 individuals in 2016 and 427 individuals in 2017) and  
153 measured 573 of these for at least one trait. We measured 179 individual's metabolic rates,  
154 dissected 165 females to count the number of mature oocytes present in the abdomen, dried  
155 and massed 184 individuals, assayed geometric morphometric shape traits of 254 individuals,  
156 and measured the forewing size and shape traits for 237 individuals. Some individuals were  
157 used for multiple measurements, but those for which we counted oocytes could not be used  
158 for mass measurements and vice versa. In addition, butterflies for which we measured  
159 metabolic traits were more likely to be tattered and excluded from wing trait measurements.  
160 Further details on the number of individuals measured for each trait by rearing year, season of  
161 development, and population can be found in Table 1.





180 NA monarchs reared in 2016 were derived from two sources: wild-caught and commercially  
181 sourced NA individuals. At the time of the first common garden experiment, we were not  
182 aware of the genetic distinctiveness of the commercial NA lineage compared with the wild  
183 NA population (Tenger-Trolander et al. 2019). Of the 179 individuals assayed for MR  
184 (Supplemental Information, Table S1), only 18 individuals were purely commercial (15  
185 summer-reared and 3 autumn-reared), 21 were NA/Commercial F1 crosses reared in summer,  
186 and 29 were backcrosses (NA/Commercial F1 backcrossed to NA) reared in autumn. While a  
187 proportion of pure commercial NA monarchs have lost the propensity to orient south in  
188 response to autumn rearing conditions (Tenger-Trolander et al. 2019; Tenger-Trolander and  
189 Kronforst 2020), the backcrosses (NA/Commercial F1 backcrossed to NA) reared in autumn  
190 showed clear southern orientation (Tenger-Trolander et al. 2019). The commercial lineage  
191 also enters reproductive diapause when reared outdoors in autumn implying some  
192 physiological responses in the wild and commercial NA populations are similar (Tenger-  
193 Trolander et al. 2019).

#### 194 *Animal Husbandry*

195 We housed the monarchs from their respective populations in medium size (91.5cm x  
196 30.5cm<sup>2</sup>) mesh pop-up cages outdoors with access to the host plant, *Asclepias syriaca*. After  
197 females laid eggs, we transferred the eggs to small (30.5cm<sup>3</sup>) outdoor mesh pop-up cages and  
198 fed larvae on a diet of wild-collected *A. syriaca* cuttings. All pop-up cages were contained  
199 inside two large outdoor 1.83m<sup>3</sup> mesh cages separated by population of origin. As individuals  
200 eclosed, they were collected as virgin males and females, labeled with a unique ID, and left  
201 outdoors for a minimum of three days. Adults were then either shipped to Lincoln, NE for  
202 metabolic measurement or measured for morphological traits in Chicago. Adult butterflies

203 were shipped overnight in glassine envelopes, spending between 12-24 hours in a dark  
204 cardboard box. Upon arrival, butterflies were separated by sex and housed in large collapsible  
205 butterfly cages in a laboratory space with natural light. Prior to metabolic measurements, all  
206 individuals were given at least 48 hours to acclimate. Individuals kept in Chicago were also  
207 separated by sex and housed outdoors in Chicago, IL until frozen for morphological trait  
208 measurements. All butterflies had access to a constant supply of artificial nectar (Birds Choice  
209 Butterfly Nectar, Chilton, WI).

210 In 2017, summer-reared monarchs were shipped back to Chicago from Lincoln to  
211 found the autumn generation due to a summer die-off caused by the spillover of the pesticide  
212 permethrin from a neighboring yard in Chicago. None of the summer-reared monarchs that we  
213 measured were present when this exposure occurred, and the subsequent autumn generation of  
214 monarchs was founded by individuals not present during the die-off.

#### 215 *Mature oocyte counts*

216 Females were kept separately from males and never mated. We dissected females by  
217 making a longitudinal cut down the abdomen to remove eggs. We then counted the number of  
218 mature oocytes present. Immature and mature oocytes in monarchs are distinguished by the  
219 shape of the chorion. A smooth chorion surface indicates an immature oocyte while a chorion  
220 with ridges is considered mature.

#### 221 *Body mass measurements*

222 We removed the wings, antennae, head, and legs from the body. We separated the  
223 thorax and abdomen and dried them at 60°C in an incubator with a silica crystal desiccant for  
224 72 hours. After drying, we weighed the thorax and abdomen both separately and together on  
225 an analytical balance.

226 *Wing size and shape measurements*

227           We placed a single forewing and hindwing on a sheet of gridded paper with 0.635 cm  
228 squares or on a white sheet of paper with a metric ruler in view. We photographed the wings  
229 using a DSLR Canon EOS 70d camera with an 18-55mm lens. We scaled each photo by  
230 number of pixels/cm and converted the color photos to 8-bit black/white images in ImageJ  
231 (Schindelin et al. 2012; Rueden et al. 2017). We filled in non-black portions of the forewing  
232 with black to measure area (Supplementary Information, Figure S1). Before measuring area or  
233 shape attributes, we smoothed the contours of the forewings with the ImageJ plugin ‘Shape  
234 smoothing’ (Erdenetsogt and Wagner 2016). ‘Shape smoothing’ applies a Fourier  
235 transformation to gain Fourier descriptors (FDs). We kept 0.35% of FDs relative to the total  
236 number of FDs identified in the image (Supplementary Information, Figure S1). We then  
237 measured the area (in cm<sup>2</sup>), aspect ratio (length/width), and circularity ( $4\pi \cdot \text{area} / \text{perimeter}^2$ ) of  
238 each forewing in ImageJ (Rueden et al. 2017). To measure aspect ratio, ImageJ finds the  
239 longest length (major axis) and width (minor axis) of the object while maintaining the  
240 perpendicular intersection of both lines and divides the major axis length by the minor. Higher  
241 circularity scores indicate a more circular wing shape whereas lower scores more polygonal or  
242 angular shapes. Circularity is different than roundness ( $4 \cdot \text{area} / (\pi \cdot \text{major\_axis}^2)$ ). For example,  
243 a hexagon has high circularity and low roundness whereas an oval has low circularity and  
244 high roundness.

245           We also used 2D landmark-based geometric morphometrics to assess shape  
246 differences. Using the software tpsDIG2ws, we placed 16 landmarks at homologous points  
247 (vein intersections and margins) on each forewing (Rohlf 2006) (Supplementary Information,  
248 Figure S2). We analyzed the resulting landmark data in R using the package ‘Geomorph’

249 (Adams and Collyer 2020). We performed a general Procrustes analysis that removed  
250 differences in orientation and size, allowing us to focus exclusively on shape differences  
251 (Supplementary Information, Figure S3). We then calculated the mean shape which is the  
252 average landmark coordinates for a set of aligned wings. For each of the 16 landmarks, we  
253 calculated the distance between the individual's coordinates and the group mean coordinates  
254 and summed those distances to find each specimen's total distance from the mean shape.

### 255 *Metabolic rate measures*

256 Using flow-through respirometry, we estimated resting or routine metabolic rate (MR)  
257 and maximal flight MR from the volume of CO<sub>2</sub> (VCO<sub>2</sub>) produced by individual adult  
258 monarchs ranging from 3-45 days old. While not ideal, this age range was a consequence of  
259 shipping logistics between Chicago and Lincoln. Age was not a significant predictor of MR,  
260 even when controlling for mass in an analysis of covariance (routine MR,  $P = 0.157$ ; flight  
261 MR,  $P=0.310$ ). Older butterflies tended to be smaller (effect of age on mass,  $P = 0.009$ ), and  
262 variation in mass was accounted for in our statistical analysis of MR (see below in *Statistical*  
263 *Analyses*). Butterflies were placed in a 3.3-liter glass cylindrical container covered with a  
264 piece of black velvet cloth ensuring complete darkness during resting MR measurements.  
265 CO<sub>2</sub>-free, dry air was pumped through the container at a rate of 3 liters/minute using a dual  
266 pump system (Sable Systems International, Las Vegas, NV, USA) coupled with a mass-flow  
267 valve (Sierra Instruments, Monterey, CA, USA). After the air left the measurement container,  
268 it was subsampled at 100 ml/min using a SS-4 Sub-Sampler pump (Sable Systems  
269 International, Las Vegas, NV, USA), scrubbed of water and then passed into a high-  
270 performance CO<sub>2</sub>/H<sub>2</sub>O differential gas analyzer (LI-7000, Li-Cor, Lincoln, NE, USA) to

271 quantify CO<sub>2</sub>. All MR data were collected using the Expedata software package (Sable  
272 Systems International, Las Vegas, NV, USA).

273         Individuals rested in the cloth-covered chamber at 21°C for a minimum of 25 minutes  
274 prior to metabolic rate measurement. Before removing the cloth, we recorded resting MR until  
275 a stable resting MR was established. We then removed the cloth and exposed the individual to  
276 full-spectrum UV light. After 30 seconds of light exposure, we induced flight by gently  
277 shaking the container. We recorded 10 minutes of CO<sub>2</sub> production during flight. If butterflies  
278 stopped flying during this 10-min period, we gently shook the chamber to induce flight. After  
279 flying for 10 minutes, we turned off the light and covered the container to allow the butterfly  
280 to return to a stable resting MR. While 21°C is cooler than others' have used to measure flight  
281 metabolic rate (e.g., Zhan et al. 2014; Pocius et al. 2022), we chose this because it was the  
282 common garden temperature at which all monarchs were being held in the lab prior to  
283 measurements. We experienced no issues inducing flight, which was likely facilitated by  
284 warming due to the full-spectrum UV light and monarch thermoregulatory behavior (Masters  
285 et al. 1988). The maximal rate of CO<sub>2</sub> production sustained over a 1-min period during the 10-  
286 minute flight was used as our estimate of maximal flight MR. Before and after each metabolic  
287 measurement, baseline CO<sub>2</sub> values were recorded and drift-corrected using the two-endpoint  
288 method in Expedata. To compensate for a response lag in the respirometry system, we utilized  
289 the “Z-transformation” function (instantaneous transformation) in Expedata. Raw CO<sub>2</sub> values  
290 were converted from parts per million to ml/hr.

### 291 *Statistical analyses*

292         For analyses of morphological traits, we used the R package ‘glmulti’ to automatically  
293 select the best fit generalized linear model for each trait and determine which of the

294 independent variables (sex, population, season) were significant predictors of the  
295 measurements (Calcagno and de Mazancourt, 2010; R Core Team 2013). We fit thorax mass  
296 (grams), thorax:body mass ratio, forewing area (cm<sup>2</sup>), and abdomen mass (log-transformed)  
297 within the Gaussian family as these traits were normally distributed (Supplementary  
298 Information, Figure S4A, Table S2 and S3). For egg counts, we fit the model with a negative  
299 binomial distribution (Supplementary Information, Figure S4B and Table S4).

300 To quantify the association between each independent variable and dependent variable  
301 for our glms, we calculated effect size with the statistic Eta squared ( $\eta^2$ ) which is the ratio of  
302 each group's sum of squares to the total sum of squares. It is interpreted as the percentage of  
303 variance accounted for by each variable in the glm. For the negative binomial model, we  
304 relied on model coefficients to determine the predominant effect. We further performed the  
305 rank-based nonparametric Kruskal-Wallis test to determine whether there were differences  
306 between groups and then a post hoc Dunn test (with a Bonferroni correction for multiple  
307 testing) to determine which groups were different. Circularity scores, aspect ratios, and mean  
308 shape distances were not normally distributed, and various transformations of the  
309 measurements did not yield normal distributions (Supplementary Information, Figure S4C). In  
310 these cases, we relied on the rank-based nonparametric Kruskal-Wallis test with post hoc  
311 Dunn test (with a Bonferroni correction) to identify differences between groups.

312 We used standardized major axis regression (SMA) implemented in the R package  
313 "smatr" (Warton et al. 2006; R Core Team 2013) to test for the effects of rearing conditions  
314 and population on metabolic rate. SMA controls for the relationship between metabolic rate  
315 and mass (in our case, whole-body wet mass) like an analysis of covariance, but it accounts  
316 for the fact that both metabolic rate and mass are measured with error. We used SMA to fit the

317 metabolic scaling relationship between  $\ln(\text{VCO}_2)$  and  $\ln(\text{mass})$  for all individuals within  
318 particular combinations of the factors sex, population (NA and CR), and rearing season  
319 (summer and autumn). We first tested whether the scaling relationship between MR and mass  
320 was similar between levels of our independent factors (i.e., testing for difference in slopes).  
321 When there was no evidence of a mass x factor interaction, we fit a common slope and then  
322 tested whether there was a significant effect of the factor on the elevation of the relationship  
323 between MR and mass (i.e., a difference in the mass-specific metabolic rate) or a significant  
324 shift along the x-axis between factor levels (i.e., a difference in mass). Because females and  
325 males did not differ significantly in the scaling relationship between MR and mass or in mass-  
326 specific MR (Supplementary Information, Table S5), the sexes were combined for all  
327 subsequent analyses. The scaling exponents relating  $\ln(\text{VCO}_2)$  and  $\ln(\text{mass})$  were greater than  
328 1. While this deviates from the broad interspecific pattern where metabolic rate scales with  
329 mass to the  $\frac{3}{4}$  power, intraspecific scaling exponents frequently deviate from this expectation  
330 (Glazier 2005; Greenlee et al. 2014). These scaling exponents may also have differed if we  
331 had chosen a different measure for mass, e.g., with wings removed.

332         We used mass-corrected resting and flight MRs to test for the statistical significance of  
333 interactions between population and rearing condition on metabolic rates, which would  
334 indicate a difference in plasticity between NA and CR monarchs. Mass-corrected MRs were  
335 obtained by taking the residual for each individual from the SMA fits of  $\ln(\text{VCO}_2)$  as a  
336 function of  $\ln(\text{mass})$  and adding back the average  $\ln(\text{VCO}_2)$  to obtain a meaningful scale as in  
337 Hoekstra et al. (2013). The mass-corrected MRs were used as the dependent variable in linear  
338 models to test for the effects of population, rearing season, and the statistical interaction  
339 between population and rearing season.



## 340 Results

### 341 *Both NA and CR monarchs exhibit seasonal plasticity in female reproduction*

342 The number of mature oocytes present in a female monarch's abdomen was best  
343 explained by the additive effects of season and population (Supplementary Information, Table  
344 S4). Both CR and NA monarchs had fewer mature oocytes when reared in autumn (Figure 2,  
345 Kruskal-Wallis  $\chi^2 = 64.32$ ,  $df = 3$ ,  $P = 7.02e-14$ ), consistent with the known seasonal  
346 reproductive diapause. Season had a larger effect size estimate (1.31, 95% CI [0.94, 1.66])  
347 than did population (-0.62, 95% CI [-0.97, -0.28]) with little CI overlap. Although our model  
348 suggests there was a significant effect of population, differences between CR and NA  
349 monarchs within each seasonal rearing environment were not significant after correcting for  
350 multiple tests.

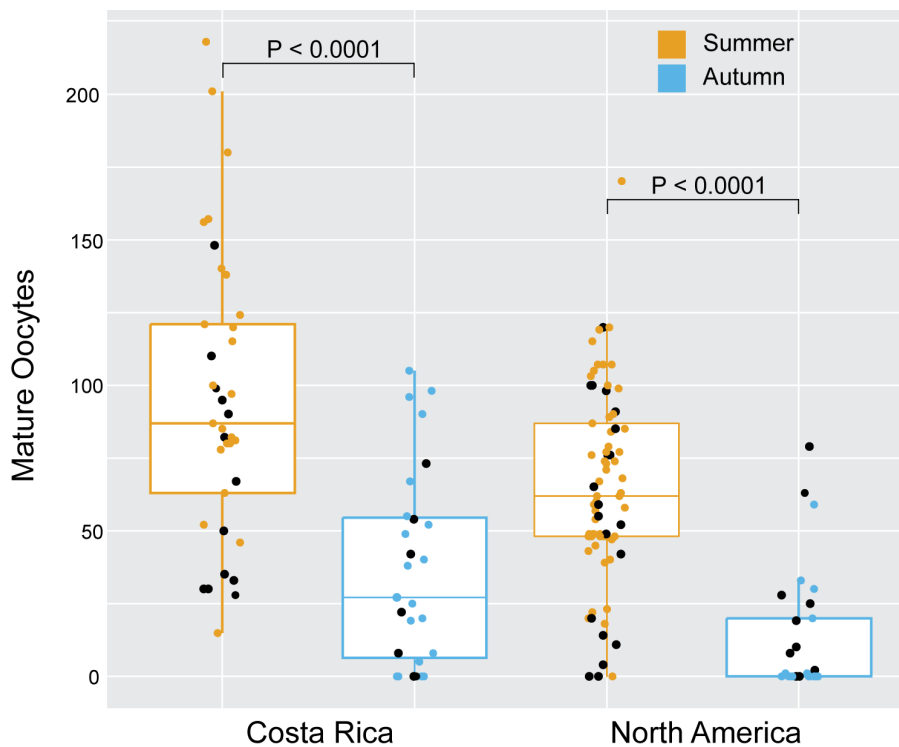

351

352 **Figure 2.** Boxplot of mature oocytes in female monarchs. Both CR and NA monarchs have  
353 decreased numbers of mature oocytes in response to autumn rearing, relative to summer rearing.

354 Significant differences between rearing seasons are indicated on the plot. Black dots highlight  
355 individuals also assayed for metabolic rates.

356 *Components of body mass differ in seasonal plasticity between sexes and populations*

357 Total body mass (the combined mass of the thorax and abdomen) did not differ  
358 significantly between populations, rearing seasons, or sexes (mean = 0.0845 grams, Kruskal-  
359 Wallis  $\chi^2 = 11.4$ ,  $df = 7$ ,  $P = 0.12$ ). However, abdomen mass was seasonally plastic in both NA  
360 and CR monarchs, and this plasticity differed between the sexes (Table 2). A model including  
361 season, sex, and their interaction explained ~10% of variation in abdomen mass ( $R^2 = 0.096$ ;  
362 Table 2). Males reared in summer had lighter abdomens than females reared in summer  
363 (female mean = 0.0352g vs male mean = 0.043g, Kruskal-Wallis  $\chi^2 = 16.8$ ,  $df = 7$ ,  $P = 0.019$ ,  
364 Dunn test with Bonferroni correction,  $P = 0.0035$ ), and males increased abdomen mass in  
365 response to autumn (autumn mean = .0454g vs summer mean = 0.0352g, Dunn test with  
366 Bonferroni correction,  $P = 0.0043$ ).

367 Thorax mass was seasonally plastic in both populations, with no evidence for a  
368 statistical interaction between season and population (Table 2). A model including rearing  
369 season, sex, and population explained 19% ( $R^2 = 0.19$ ) of the variation in thorax mass (Table  
370 2). An individual's thorax was likely to be heavier if population was NA, sex was male, and  
371 season of development was autumn (Supplementary Information, Figure S5). A post-hoc test  
372 found no significant differences between NA males and females or CR males and females  
373 reared in either season, though the difference between CR males and females was nearly  
374 significant in autumn (Kruskal-Wallis  $\chi^2 = 38.67$ ,  $df = 7$ ,  $P < 0.0001$ , Dunn test with  
375 Bonferroni correction, NA:  $P = 0.88$ ,  $P = 1.0$ , CR:  $P = 0.48$ ,  $P = 0.08$ , summer and autumn  
376 respectively).

377 **Table 2.** Summary of the best fit general linear model (glm) for abdomen mas, thorax mass, the  
 378 ratio of thorax:body mass, and forewing area. Each model's  $R^2$  is reported along with the  
 379 significance and effect size of each independent variable in the model.  $\eta^2$  (Eta squared) is a  
 380 measure of effect size that can be interpreted as the amount of variance accounted for by each  
 381 variable in the best fit glm.

| <b>Abdomen mass, <math>R^2 = 0.096</math></b>      |    |         |          |         |              |          |
|----------------------------------------------------|----|---------|----------|---------|--------------|----------|
| Independent variable                               | df | Sum Sq  | Mean Sq  | F value | P value      | $\eta^2$ |
| Sex                                                | 1  | 0.31    | 0.3105   | 3.382   | 0.06755 .    | 0.017    |
| Season                                             | 1  | 0.284   | 0.2843   | 3.097   | 0.08015 .    | 0.016    |
| Sex:Season                                         | 1  | 1.168   | 1.1684   | 12.728  | 0.00046 ***  | 0.064    |
| <b>Thorax mass, <math>R^2 = 0.189</math></b>       |    |         |          |         |              |          |
| Independent variable                               | df | Sum Sq  | Mean Sq  | F value | P value      | $\eta^2$ |
| Season                                             | 1  | 0.00078 | 0.000775 | 10.39   | 0.0015 **    | 0.047    |
| Sex                                                | 1  | 0.00129 | 0.001294 | 17.36   | 4.81E-05 *** | 0.078    |
| Population                                         | 1  | 0.00106 | 0.001058 | 14.19   | 0.00022 ***  | 0.064    |
| <b>Thorax:body ratio, <math>R^2 = 0.274</math></b> |    |         |          |         |              |          |
| Independent variable                               | df | Sum Sq  | Mean Sq  | F value | P value      | $\eta^2$ |
| Season                                             | 1  | 0.001   | 0.00095  | 0.272   | 0.60253      | 0.001    |
| Sex                                                | 1  | 0.1072  | 0.10724  | 30.591  | 1.12E-07 *** | 0.125    |
| Population                                         | 1  | 0.0417  | 0.04172  | 11.9    | 0.0007 ***   | 0.049    |
| Season:Sex                                         | 1  | 0.0614  | 0.06138  | 17.51   | 4.48E-05 *** | 0.071    |
| Sex:Population                                     | 1  | 0.024   | 0.02399  | 6.844   | 0.00966 **   | 0.028    |
| <b>Forewing area, <math>R^2 = 0.37</math></b>      |    |         |          |         |              |          |
| Independent variable                               | df | Sum Sq  | Mean Sq  | F value | P value      | $\eta^2$ |
| Season                                             | 1  | 7.62    | 7.62     | 19.564  | 1.49E-05 *** | 0.053    |
| Population                                         | 1  | 43.29   | 43.29    | 111.09  | < 2e-16 ***  | 0.3      |
| Season:Population                                  | 1  | 2.41    | 2.41     | 6.173   | 0.0137 *     | 0.017    |

382  
 383 The ratio of thorax mass to total body mass was seasonally plastic in females,  
 384 particularly in NA monarchs (Table 2). A model including population and sex, as well as  
 385 interactions between population and sex and between sex and season explained 27% of the  
 386 variation in the thorax:body mass ratio ( $R^2 = 0.27$ ). Sex had the largest effect with males  
 387 having higher thorax:body mass ratios than females. NA monarchs had higher thorax:body  
 388 mass ratios than did CR monarchs. Females increased the thorax:body mass ratio when reared  
 389 in autumn relative to summer, and this effect of season was significant in NA but not in CR  
 390 females (Figure 3, Kruskal-Wallis  $\chi^2 = 52.97$ ,  $df = 7$ ,  $P < 0.0001$ , Dunn test with Bonferroni

391 correction, CR:  $P = 1$  and NA:  $P = 0.0246$ ). Autumn-reared NA female thorax:body mass  
392 ratios were significantly greater than those of autumn-reared CR females (Figure 3, Dunn test  
393 with Bonferroni correction  $P = 0.0125$ ). In summary, investment in thorax mass as a fraction  
394 of total body mass exhibits a sex-specific plasticity that was significant in NA monarchs, with  
395 NA females developing a more male-like pattern of investment in autumn versus summer.

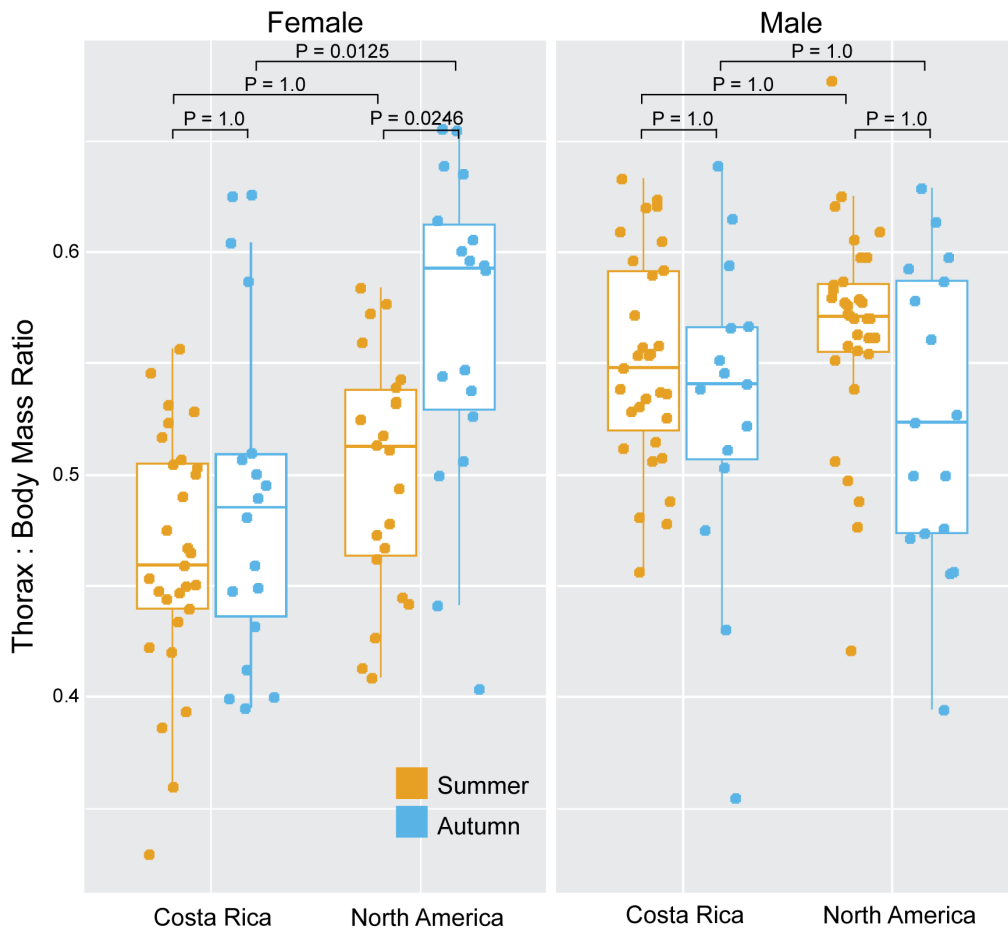

396

397 **Figure 3.** Boxplot of the ratio of thorax mass to total body (thorax + abdomen) mass. Scores  
398 above 0.5 indicate an individual has invested more of their total mass in the thorax than in  
399 abdomen. NA female monarchs increase investment in thorax tissue in autumn. P-values for  
400 differences between season, sex, and population are indicated on the plot.

401

402 *Only NA monarchs exhibit seasonal plasticity in wing size*

403 Wing area was seasonally plastic in NA monarchs. Variation in wing area was best  
404 explained by a model that included the effects of rearing season and population, as well as  
405 their interaction ( $R^2 = 0.37$ ; Table 2). NA monarchs reared in autumn had on average 8%  
406 larger forewings than the NA summer-reared monarchs (Figure 4, summer mean = 7.26 cm<sup>2</sup> vs  
407 autumn mean = 7.87 cm<sup>2</sup>, Kruskal-Wallis  $\chi^2 = 90.68$ ,  $df = 3$ ,  $P < 0.0001$ , Dunn test with  
408 Bonferroni correction,  $P < 0.0001$ ) and 16% larger forewings than the CR autumn-reared  
409 monarchs. CR monarch forewing area was not seasonally plastic (Figure 4, summer mean =  
410 6.56 cm<sup>2</sup> vs autumn mean = 6.79 cm<sup>2</sup>, Dunn test with Bonferroni correction,  $P = 0.54$ ).

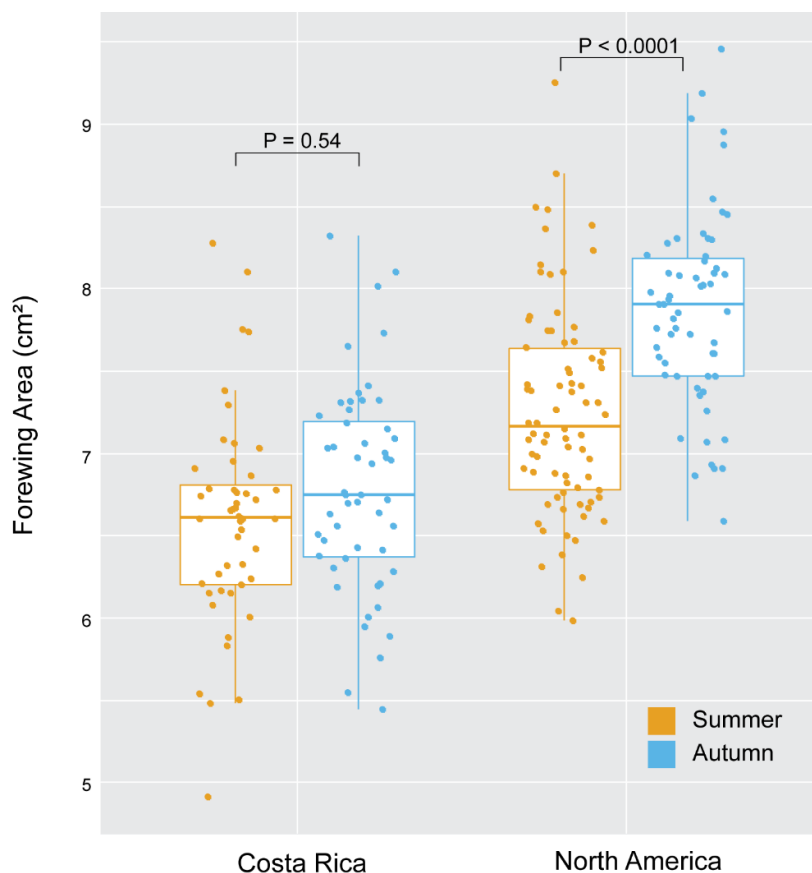

411 **Figure 4.** Boxplot of the forewing area measured in cm<sup>2</sup>. NA monarchs increase the size of  
412 their forewing in response to autumn while CR monarchs do not. P-values for differences  
413 between seasons in each population are indicated on the plot.

414

415 *Neither NA nor CR monarchs exhibit seasonal plasticity in wing shape*

416 In contrast, measures of forewing shape did not differ between NA and CR monarchs  
417 and showed little to no within population plasticity. Variation in forewing aspect ratio was not  
418 explained by sex, season, population, or any of their interactions (Kruskal-Wallis  $\chi^2 = 7.37$ ,  $df$   
419  $= 7$ ,  $P = 0.39$ ). Circularity of the forewing, where a value of 1 is a perfect circle and  
420 decreasing scores indicate more polygonal (angular) forewings, was not seasonally plastic in  
421 either population, although NA monarchs trended towards more angular wings in autumn  
422 (Supplementary Information, Figure S8A, Kruskal-Wallis  $\chi^2 = 8.72$ ,  $df = 3$ ,  $P = 0.03$ , Dunn  
423 test with Bonferroni correction, NA:  $P = 0.085$  and CR:  $P = 0.85$ ). Geometric morphometric  
424 analysis did not reveal any differences in mean shape between NA and CR forewings in either  
425 season, and neither population exhibited any seasonal plasticity in this measure of forewing  
426 shape (Supplementary Information, Figure S6 and S7). To quantify variability in forewing  
427 shape, we measured the distance of each individual forewing's landmark to the respective  
428 consensus mean landmark and summed those distances. Total distance from the mean shape  
429 did not vary by population or season (Supplementary Information, Figure S8B, Kruskal-  
430 Wallis  $\chi^2 = 3.58$ ,  $df = 3$ ,  $P = 0.31$ ).

431 *Metabolic rates were seasonally plastic in CR but not NA monarchs*

432 Resting MR of NA monarchs was not seasonally plastic (mass x rearing,  $P = 0.55$ ;  
433 rearing,  $P = 0.37$ ) (Figure 5B and Supplementary Information, Table S6). However, autumn-  
434 reared CR monarchs had significantly greater resting MR relative to summer-reared CR  
435 monarchs (mass x rearing,  $P = 0.86$ ; rearing,  $P = 2.63E-08$ ) (Figure 5A and Supplementary  
436 Information, Table S6). Variation in mass-corrected MR was explained by a significant  
437 interaction between rearing season and population ( $P = 0.004$ ; Table 3), with only CR

438 monarchs exhibiting seasonal plasticity (Figure 5C). Resting MR of summer-reared NA and  
439 CR monarchs were not significantly different, but resting MR of CR monarchs was  
440 significantly greater than that of NA monarchs reared in autumn (Supplementary Information,  
441 Table S7).

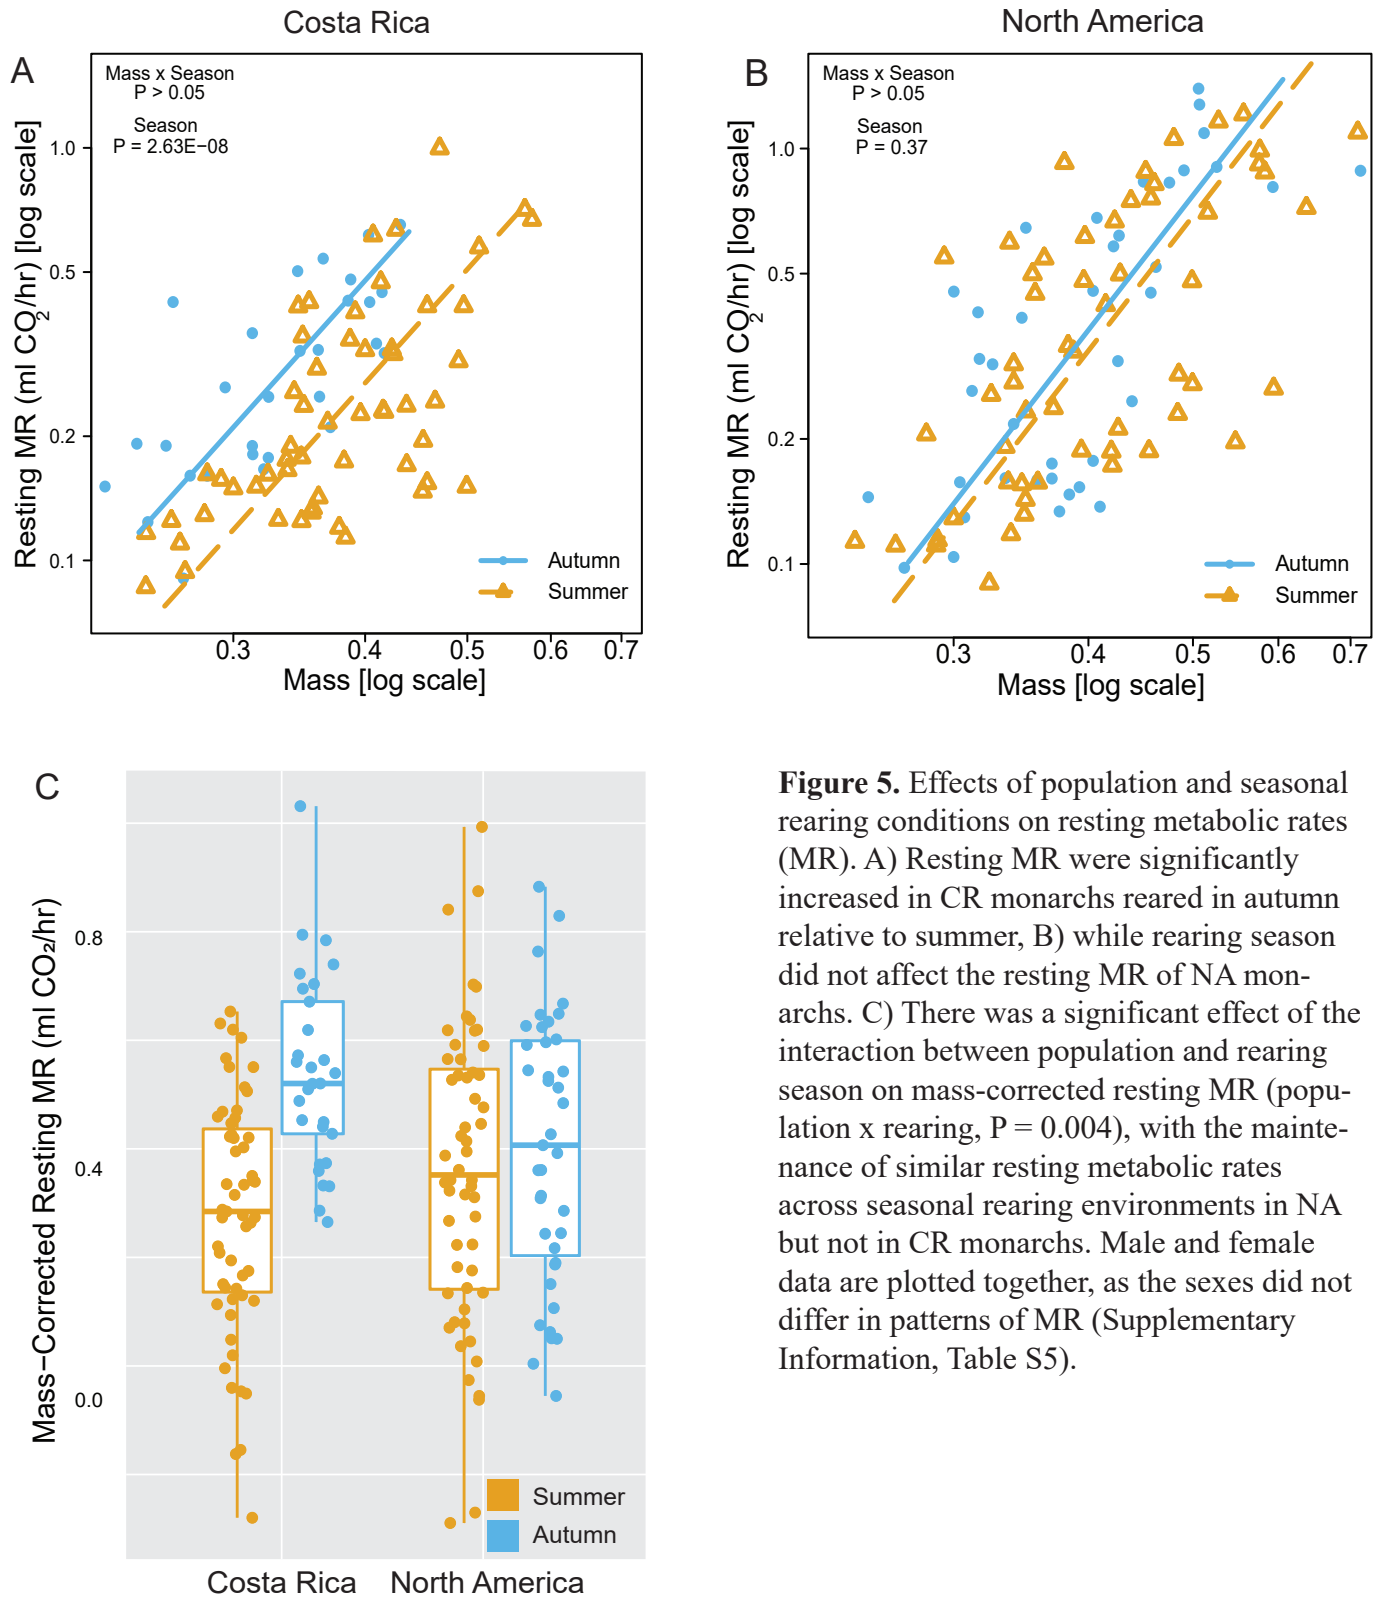

**Figure 5.** Effects of population and seasonal rearing conditions on resting metabolic rates (MR). A) Resting MR were significantly increased in CR monarchs reared in autumn relative to summer, B) while rearing season did not affect the resting MR of NA monarchs. C) There was a significant effect of the interaction between population and rearing season on mass-corrected resting MR (population x rearing, P = 0.004), with the maintenance of similar resting metabolic rates across seasonal rearing environments in NA but not in CR monarchs. Male and female data are plotted together, as the sexes did not differ in patterns of MR (Supplementary Information, Table S5).



442 Similar to patterns for resting MR, CR monarchs had elevated flight MR when reared  
443 in autumn relative to summer (mass x rearing,  $P = 0.19$ , rearing  $P = 0.04$ ) (Figure 6A and  
444 Supplementary Information, Table S6), but maximal flight MR in NA monarchs was not  
445 seasonally plastic (mass x rearing,  $P = 0.97$ ; rearing  $P = 0.19$ ) (Figure 6B and Supplementary  
446 Information, Table S6). When we corrected flight MR for mass, there was a significant effect  
447 of season ( $P = 0.0283$ ; Table 3) but no significant interaction between rearing season and  
448 population (Table 3). However, the magnitude of seasonal plasticity in mass-corrected flight  
449 MR appeared larger in CR relative to NA monarchs (Figure 6C). Flight MR of summer-reared  
450 NA and CR monarchs were not significantly different, but autumn-reared CR and NA  
451 monarchs differed in the scaling relationship with mass, with larger NA monarchs maintaining  
452 lower flight MR than CR monarchs (Supplementary Information, Table S7).

453 **Table 3.** Summary of general linear model used to test for effects of population and rearing  
454 season on mass-corrected MR.

455

| Trait                     | Independent Variable | df | Sum Sq | Mean Sq | F-value | P-value    |
|---------------------------|----------------------|----|--------|---------|---------|------------|
| Mass-corrected resting MR | Population           | 1  | 0.001  | 0.0014  | 0.03    | 0.8746     |
|                           | Season               | 1  | 0.879  | 0.8789  | 15.64   | 0.0001 *** |
|                           | Population:Season    | 1  | 0.490  | 0.4900  | 8.72    | 0.0036 **  |
| Mass-corrected flight MR  | Population           | 1  | 0.036  | 0.0360  | 0.70    | 0.404      |
|                           | Season               | 1  | 0.252  | 0.2515  | 4.89    | 0.0283 *   |
|                           | Population:Season    | 1  | 0.023  | 0.0232  | 0.45    | 0.5026     |

456

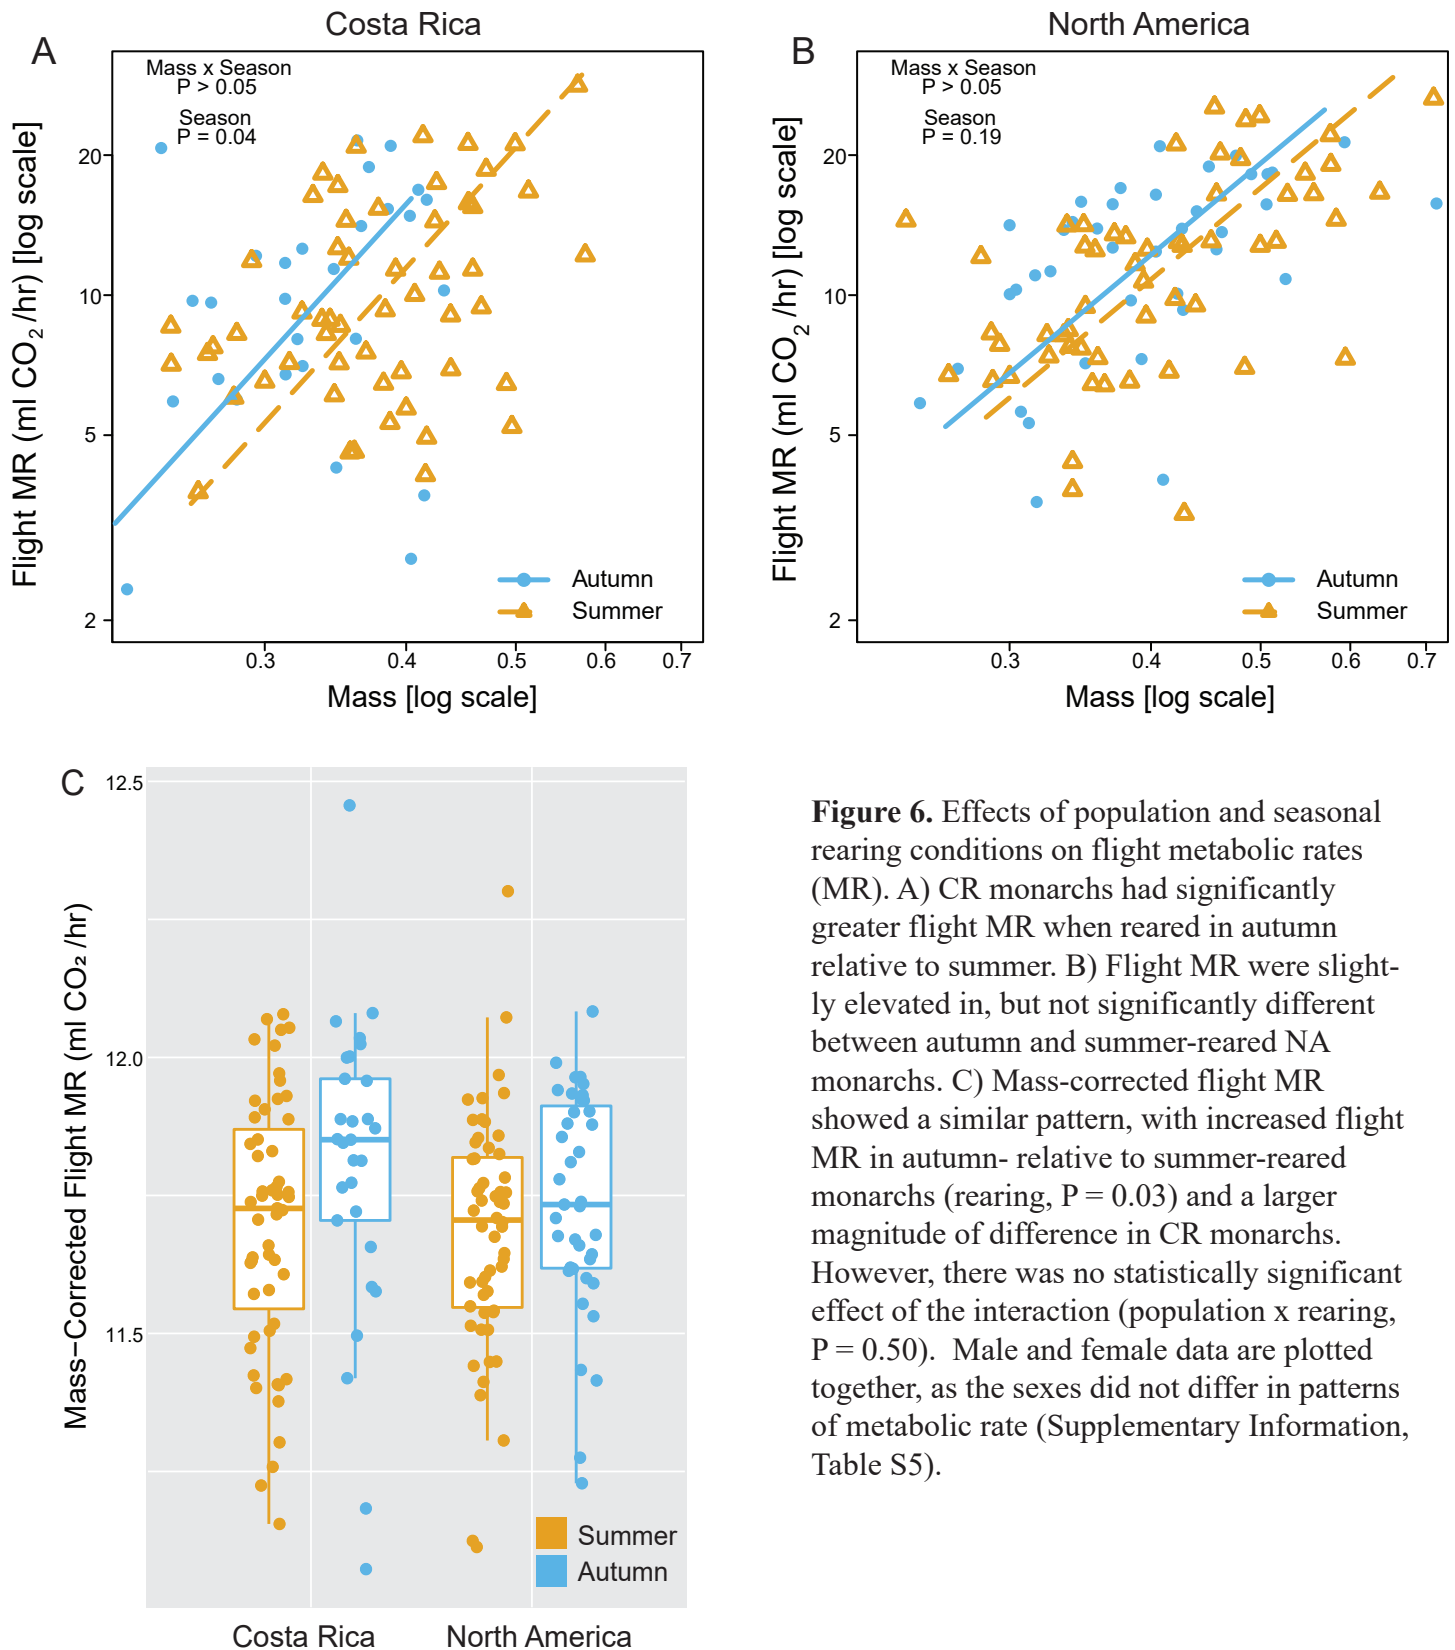

## 457 **Discussion**

458           We compared ancestral temperate (NA) and derived tropical (CR) monarch  
459 populations for the extent of seasonal plasticity in physiological and morphological traits  
460 suspected to be adaptive for monarch migration and overwintering. We predicted that  
461 plasticity would be lost in monarch populations that have dispersed into more stable, tropical  
462 habitats, such as Costa Rica. We found that the non-migratory CR descendants of the  
463 migratory NA population retain some, but not all ancestral seasonal trait plasticity. This  
464 suggests that seasonal plasticity in monarchs can be lost in a piecemeal fashion in the absence  
465 of selective pressures for its maintenance. The maintenance of metabolic rates in autumn  
466 compared to summer, plus the increase in wing size and thorax mass relative to total body  
467 mass in NA monarchs, suggest that these traits may be important for migration success and  
468 that the regulation of these traits may be critical to maintaining alternative summer and  
469 autumn phenotypes.

470           Mass differences in the abdomen and thorax are consistent with different selective  
471 pressures facing females versus males as well as NA versus CR populations. Autumn rearing  
472 induces an apparent shift in resources in females presumably from egg mass to flight muscle,  
473 consistent with the idea that successful autumn migration is critical for both sexes. While NA  
474 male and female monarchs were not significantly different in thorax mass in either season in  
475 our comparisons, a previous experiment that compared thorax mass in NA monarchs found  
476 significant differences between thorax mass in males and females (Davis and Holden 2015).  
477 Particularly in summer, we saw a similar trend towards larger male thoraxes, and sex was a  
478 significant predictor of thorax mass in our glm. Though not to the same degree as NA  
479 females, CR females also responded to autumn by increasing the thorax to body mass ratio

480 though the difference comes from a decrease in abdomen mass rather than an increase in  
481 thorax mass in autumn. In summary, CR females retained seasonally plastic reproduction, but  
482 the seasonal shift in allocation to thorax mass may be eroding. Further investigation of  
483 plasticity in resource allocation into reproductive and flight muscle tissues are warranted, as  
484 well as investigation of whether other abiotic factors (e.g., drought or host-plant quality) may  
485 induce reproductive diapause and maintain plasticity for this trait in tropical monarch  
486 populations.

487         Forewing size was the most divergent morphological trait between NA and CR  
488 monarchs. Consistent with other work comparing migratory and resident monarch  
489 populations, we found CR monarchs had smaller wings than NA monarchs (Beall and  
490 Williams 1945; Dockx 2007; Altizer and Davis 2010; Li et al. 2016; Freedman et al. 2020).  
491 However, unlike previous work, our study explicitly compared monarchs reared in the NA  
492 monarch's migratory range in summer and autumn. We found that forewing size was  
493 seasonally plastic in NA but not in CR monarchs. Previous measurements from a study of  
494 museum specimens collected in North America between 1878-2017 noted that autumn-  
495 collected individuals had larger wings than summer (Freedman and Dingle 2018). Our data  
496 suggest that this difference is at least partly explained by seasonal plasticity in wing size  
497 rather than differential mortality during migration (Flockhart et al. 2017; Davis et al. 2020).  
498 The smaller forewing size of CR and other resident monarch populations plus the CR  
499 monarchs' lack of plasticity suggests that adaptation to the local environment post-dispersal  
500 may have selected for smaller wing size. Meanwhile, large wing size is likely under constant  
501 selection in migratory NA monarch populations during autumn, as large wing size is  
502 associated with longer flight in butterflies (Altizer and Davis 2010, Li et al. 2016, Flockhart et

503 al. 2017). Thus, this might be an example where seasonal heterogeneity maintains plasticity in  
504 wing size in NA monarchs, with the summer-like small wing trait fixed in resident monarch  
505 populations that experience more summer-like conditions throughout the year. Investigating  
506 the flight and fitness consequences of these changes in wing morphology would be  
507 particularly useful for assessing whether this is an example of the loss of plasticity through  
508 adaptive assimilation.

509         The importance of wing shape to migration is less clear. Previous work found  
510 differences in shape between some resident and migratory monarchs (Dockx 2007; Altizer  
511 and Davis 2010; Satterfield and Davis 2014; Freedman et al. 2020), while other population  
512 comparisons did not find differences (Li et al. 2016; Freedman et al. 2020). Between our three  
513 measures of wing shape (geometric morphometrics, aspect ratio, and circularity), the only  
514 significant shape difference was in forewing circularity between autumn-reared NA monarchs  
515 and summer-reared CR monarchs, but the difference was small and the distributions were  
516 largely overlapping. We suggest that the difference seen in circularity when comparing wild-  
517 caught CR monarchs to NA monarchs (Altizer and Davis 2010) could be driven by  
518 developmental environment rather than population. However, we found no evidence of  
519 seasonal plasticity in wing shape in either population, consistent with findings from Flockhart  
520 et al. (2017) which found no relationship between wing roundness or aspect ratio and distance  
521 flown in NA migrators. However, others have noted differences in aspect ratio when  
522 comparing wild-caught to indoor-reared NA monarchs (Davis et al. 2020) and when  
523 comparing NA individuals caught earlier in the migration season to individuals caught later  
524 (Satterfield and Davis 2014).

525           In contrast to the prediction that NA monarchs relative to CR monarchs might exhibit  
526 greater plasticity in metabolic rates to support flight during migration, we observed that  
527 metabolic rates were affected by seasonal rearing only in CR monarchs. Autumn-reared CR  
528 monarchs had elevated resting and flight metabolic rates relative to summer-reared monarchs,  
529 while NA monarchs maintained similar and lower resting and flight metabolic rates across  
530 seasons. There are two, non-mutually exclusive, ways to interpret this pattern. First, the NA  
531 population may have seasonal plasticity in underlying physiology that maintains similar  
532 metabolic rates across seasonal environments, with the plastic mechanisms that maintain  
533 metabolic rate across the seasons lost in the CR population. Second, if the CR population has  
534 lost either the maternal provisioning or developmental mechanisms appropriate for the shorter  
535 photoperiod days of autumn, then the elevated metabolic rates in autumn-reared CR monarchs  
536 may be the consequence of coping with environmental stress during development. That stress,  
537 however, cannot be attributed to differences between reproductive output or host plant  
538 between the populations, as monarchs from both populations significantly decreased egg  
539 counts in response to autumn and consumed common milkweed in both summer and autumn  
540 in our common garden experiment. We note that while common milkweed differs from CR's  
541 native tropical milkweed host (*Asclepias curassavica*), this did not result in differences in  
542 metabolic rate between the populations in the summer, suggesting that any effect of host plant  
543 on population differences in metabolic rate in our study must interact with the effect of  
544 seasonal rearing.

545           Our results were similar to previous studies of metabolic rates in NA and CR  
546 monarchs that were reared in summer (Zhan et al. 2014), although that study used somewhat  
547 different measures of metabolic rates and did detect differences in flight metabolic rate

548 between migratory NA and resident Florida monarchs. Zhan et al. (2014) also found evidence  
549 for positive selection and divergent expression of collagen IV alpha-1 and alpha-2 in adult  
550 thoracic muscle tissue between migratory and non-migratory populations of monarchs. These  
551 proteins are essential for muscle morphogenesis and function (Schnorrer et al. 2010), and have  
552 been interpreted as evidence for the evolution of flight efficiency in migrating monarchs  
553 (Zhan et al. 2014). Flight is energetically demanding, and selection for long-distance  
554 migratory flight may favor more efficient flight relative to shorter duration flight (Rankin and  
555 Burchsted 1992). Our results lend support to this hypothesis, as we found that NA monarchs  
556 maintained similar resting and flight metabolic rates across seasons. We suggest that  
557 migration is supported not by increased metabolic output but likely through other seasonally  
558 plastic changes (e.g., in wing area, as we observed, and/or muscle structures) that enable more  
559 efficient flight. These results contrast with some other migratory and dispersing insects that  
560 have higher metabolic rates compared to their non-migratory and non-dispersing counterparts  
561 (Tanaka and Okuda 1996; Zera et al. 1997; Crnokrak and Roff 2002; Niitepõld et al. 2009).  
562 Of these examples, NA monarchs migrate the farthest and live the longest. Thus, the  
563 maintenance of low metabolic rates may enable monarchs to better survive the months-long  
564 overwintering period in Mexico where they consume very little food. Our observation that NA  
565 butterflies are able to maintain low flight MR unlike CR butterflies reared in autumn may also  
566 indicate that NA monarch physiology enables more efficient flight in the presence of  
567 accumulated lipid reserves during migration (Gibo and McCurdy 1993; Brower et al. 2006;  
568 Schroeder et al. 2020).

569

570 **Acknowledgements**

571 We thank Michelle Noyes and Elena Sparrow for their help with rearing the monarchs in  
572 2017. We also thank Trevor Price and Micah Freedman for constructive feedback on the  
573 manuscript as well as anonymous reviewers.

574

575 **Funding**

576 This work was supported by the Graduate Research Fellowship Program, National Institute of  
577 Health Genetics and Regulation Training Grant (T32 GM07197), US Fish and Wildlife  
578 Service (Award F17AC01222), National Science Foundation Grants (IOS-1452648 and IOS-  
579 1736249), and National Institute of Health Grant (GM131828).

580

581 **Conflict of Interest Statement**

582 The authors declare no conflicts of interest.

583

584 **Author Contributions**

585 All authors participated in conceiving the ideas and designing methodology; AT-T, WL and  
586 CRJ collected the data; AT-T, CRJ and KLM analysed the data; AT-T and CRJ led the writing  
587 of the manuscript. All authors contributed critically to the drafts and gave final approval for  
588 publication.

589

590 **Data Availability**

591 All data are included in supplemental file Data.xlsx.

592 **References**

- 593 Adams, D.C., and M. Collyer. 2020. Geomorph: Software for geometric morphometric  
594 analyses, R package version 3.2.1.
- 595 Altizer, S., and A.K. Davis. 2010. Populations of monarch butterflies with different migratory  
596 behaviors show divergence in wing morphology: wing morphology and monarch  
597 migration. *Evolution* 64:1018–1028.
- 598 Arnold, W., T. Ruf, S. Reimoser, F. Tataruch, K. Ondersheka, and F. Schober. 2004.  
599 Nocturnal hypometabolism as an overwintering strategy of red deer (*Cervus elaphus*).  
600 *American Journal of Physiology-Regulatory, Integrative and Comparative Physiology*  
601 286:R174–R181. American Physiological Society.
- 602 Aubret, A., and R. Shine. 2009. Genetic assimilation and the postcolonization erosion of  
603 phenotypic plasticity in Island Tiger Snakes. *Current Biology* 19:1932-1936
- 604 Barker, J.F., and W.S. Herman. 1976. Effect of photoperiod and temperature on reproduction  
605 of the monarch butterfly. *Journal of Insect Physiology* 22:1565–1568.



- 606 Beall, G., and C.B. Williams. 1945. Geographical variation in the wing length of *Danaus*  
607 *plexippus* (lep. Rhopalocera). Proceedings of the Royal Entomological Society of  
608 London. Series A, General Entomology 20:65–76.
- 609 Brower, L.P., L.S. Fink, and P. Walford. 2006. Fueling the fall migration of the monarch  
610 butterfly. Integrative and Comparative Biology 46:1123–1142.
- 611 Butler, P.J., and A.J. Woakes. 2001. Seasonal hypothermia in a large migrating bird: saving  
612 energy for fat deposition? Journal of Experimental Biology 204:1361–1367.
- 613 Calcagno, V., and C. de Mazancourt. 2010. glmulti: An R package for easy automated model  
614 selection with (generalized) linear models. Journal of Statistical Software 34.
- 615 Catullo, R.A., J. Llewelyn, B.L. Phillips, and C.C. Moritz. 2019. The potential for rapid  
616 evolution under anthropogenic climate change. Current Biology 29:R996–R1007.
- 617 Cooper, B.S., L.A. Hammad, N.P. Fisher, J.A. Karty, and K.L. Montooth. 2012. In a variable  
618 thermal environment selection favors greater plasticity of cell membranes in *Drosophila*  
619 *melanogaster*. Evolution 66:1976–1984.
- 620 Cooper, B.S., L. A. Hammad, and K.L. Montooth. 2014. Thermal adaptation of cellular  
621 membranes in natural populations of *Drosophila melanogaster*. Functional Ecology  
622 28:886–894.
- 623 Corl, A., K. Bi, C. Luke, A.S. Challa, A.J. Stern, B. Sinervo, and R. Nielsen. 2018. The  
624 genetic basis of adaptation following plastic changes in coloration in a novel  
625 environment. Curr. Biol. 28, 2970–2977.
- 626 Crnokrak, P., and D.A. Roff. 2002. Trade-offs to flight capability in *Gryllus firmus*: the  
627 influence of whole-organism respiration rate on fitness. Journal of Evolutionary Biology  
628 15:388–398.
- 629 Davis, A.K., and M.T. Holden. 2015. Measuring intraspecific variation in flight-related  
630 morphology of monarch butterflies (*Danaus plexippus*): Which sex has the best flying  
631 gear? Journal of Insects 591705.
- 632 Davis, A.K., F.M. Smith, and A.M. Ballew. 2020. A poor substitute for the real thing: captive-  
633 reared monarch butterflies are weaker, paler and have less elongated wings than wild  
634 migrants. Biology Letters 16:20190922.
- 635 de Jong, G. 1990. Quantitative genetics of reaction norms. Journal of Evolutionary Biology  
636 3:447–468.

- 637 DeWitt, T.J., A. Sih, and D.S. Wilson. 1998. Costs and limits of phenotypic plasticity. Trends  
638 in Ecology & Evolution 13:77–81.
- 639 Dingle, H., M.P. Zalucki, and W.A. Rochester. 1999. Season-specific directional movement in  
640 migratory Australian butterflies. Australian Journal of Entomology 38:323–329.
- 641 Dockx, C. 2007. Directional and stabilizing selection on wing size and shape in migrant and  
642 resident monarch butterflies, *Danaus plexippus* (L.), in Cuba. Biological Journal of the  
643 Linnean Society 92:605–616.
- 644 Dudley, R. 2000. Kinematics and aerodynamics of flight. Pp. 75–158 in The Biomechanics of  
645 Insect Flight. Princeton University Press.
- 646 Egbert, J.R., and J.R. Belthoff. 2003. Wing shape in house finches differs relative to  
647 migratory habit in eastern and western north america. The Condor 105:825–829.
- 648 Erdenetsogt, U., and T. Wagner. 2016. Shape Smoothing.
- 649 Flockhart, D.T.T., B. Fitz-gerald, L.P. Brower, R. Derbyshire, S. Altizer, K.A. Hobson, L.I.  
650 Wassenaar, and D.R. Norris. 2017. Migration distance as a selective episode for wing  
651 morphology in a migratory insect. Movement Ecology 5(1):1-9.
- 652 Freedman, M.G., and H. Dingle. 2018. Wing morphology in migratory North American  
653 monarchs: characterizing sources of variation and understanding changes through time.  
654 Animal Migration 5:61–73.
- 655 Freedman, M.G., H. Dingle, S.Y. Strauss, and S.R. Ramírez. 2020. Two centuries of monarch  
656 butterfly collections reveal contrasting effects of range expansion and migration loss on  
657 wing traits. Proceedings of the National Academy of Sciences of the United States of  
658 America 117:28887–28893.
- 659 Freedman, M.G., H. Dingle, C.A. Tabuloc, J.C. Chiu, L.H. Yang, and M.P. Zalucki. 2018.  
660 Non-migratory monarch butterflies, *Danaus plexippus* (L.), retain developmental  
661 plasticity and a navigational mechanism associated with migration. Biological Journal  
662 of the Linnean Society 123:265–278.
- 663 Gavrillets, S., and S.M. Scheiner. 1993. The genetics of phenotypic plasticity. V. Evolution of  
664 reaction norm shape. Journal of Evolutionary Biology 6:31–48.
- 665 Gibo, D.L., and J.A. McCurdy. 1993. Lipid accumulation by migrating monarch butterflies  
666 (*Danaus plexippus* L.). Canadian Journal of Zoology 71:76-82.

- 667 Glazier, D.S. 2005. Beyond the ‘3/4-power law’: variation in the intra-and interspecific  
668 scaling of metabolic rate in animals. *Biological Reviews* 80:611–662.
- 669 Goehring, L., and K.S. Oberhauser. 2002. Effects of photoperiod, temperature, and host plant  
670 age on induction of reproductive diapause and development time in *Danaus plexippus*.  
671 *Ecological Entomology* 27:674–685.
- 672 Gomulkiewicz, R., and M. Kirkpatrick. 1992. Quantitative genetics and the evolution of  
673 reaction norms. *Evolution* 46:390–411.
- 674 Greenlee, K.J., K.L. Montooth, and B.R. Helm. 2014. Predicting Performance and Plasticity  
675 in the Development of Respiratory Structures and Metabolic Systems. *Integrative and*  
676 *Comparative Biology* 54:307–322.
- 677 Heinze, S., J. Florman, S. Asokaraj, B. el Jundi, and S.M. Reppert. 2013. Anatomical basis of  
678 sun compass navigation II: The neuronal composition of the central complex of the  
679 monarch butterfly. *Journal of Comparative Neurology* 521:267–298.
- 680 Herman, W.S., and M. Tatar. 2001. Juvenile hormone regulation of longevity in the migratory  
681 monarch butterfly. *Proceedings of the Royal Society B: Biological Sciences* 268:2509–  
682 2514.
- 683 Hoekstra, L.A., M.A. Siddiq, and K. L. Montooth. 2013. Pleiotropic effects of a  
684 mitochondrial–nuclear incompatibility depend upon the accelerating effect of  
685 temperature in *Drosophila*. *Genetics* 195:1129–1139.
- 686 James, D.G. 1984. Migration and clustering phenology of *Danaus plexippus* (L.) (Lepidoptera:  
687 Nymphalidae) in Australia. *Australian Journal of Entomology* 23:199–204.
- 688 Kawecki, T.J. 1994. Accumulation of deleterious mutations and the evolutionary cost of being  
689 a generalist. *The American Naturalist* 144:833–838.
- 690 Kingsolver, J.G., and R.B. Huey. 1998. Evolutionary analyses of morphological and  
691 physiological plasticity in thermally variable environments. *American Zoologist* 383:  
692 545–560.
- 693 Lande, R. 2009. Adaptation to an extraordinary environment by evolution of phenotypic  
694 plasticity and genetic assimilation. *Journal of Evolutionary Biology* 22:1435–1446.
- 695 Li, Y., A.A. Pierce, and J.C. de Roode. 2016. Variation in forewing size linked to migratory  
696 status in monarch butterflies. *Animal Migration* 3:27-34.

- 697 Lockwood, R., J.P. Swaddle, and J.M.V. Rayner. 1998. Avian wingtip shape reconsidered:  
698 wingtip shape indices and morphological adaptations to migration. *Journal of Avian*  
699 *Biology* 29:273–292. [Nordic Society Oikos, Wiley].
- 700 Masters, A.R., S.B. Malcolm, and L.P. Brower. 1988. Monarch butterfly (*Danaus plexippus*)  
701 thermoregulatory behavior and adaptations for overwintering in Mexico. *Ecology* 69:  
702 458–467.
- 703 Matesanz, S., and J.A. Ramírez-Valiente. 2019. A review and meta-analysis of intraspecific  
704 differences in phenotypic plasticity: Implications to forecast plant responses to climate  
705 change. *Global Ecology and Biogeography* 28:1682–1694.
- 706 Moran, N.A. 1992. The evolutionary maintenance of alternative phenotypes. *The American*  
707 *Naturalist* 139:971–989.
- 708 Nguyen, T.A.T., M.J. Beetz, C. Merlin, and B. el Jundi. 2021. Sun compass neurons are tuned  
709 to migratory orientation in monarch butterflies. *Proceedings of the Royal Society B;*  
710 *Biological Sciences*. 288:20202988.
- 711 Niitepõld, K., A.D. Smith, J.L. Osborne, D.R. Reynolds, N.L. Carreck, A.P. Martin, J.H.  
712 Marden, O. Ovaskainen, and I. Hanski. 2009. Flight metabolic rate and *Pgi* genotype  
713 influence butterfly dispersal rate in the field. *Ecology* 90:2223–2232.
- 714 O’Connor, M.I., E.R. Selig, M.L. Pinsky, and F. Altermatt. 2012. Toward a conceptual  
715 synthesis for climate change responses. *Global Ecology and Biogeography* 21:693–703.
- 716 Pfeiler, E., N.O. Nazario-Yepiz, F. Pérez-Gálvez, C.A. Chávez-Mora, M.R.L. Laclette, E.  
717 Rendón-Salinas, and T.A. Markow. 2017. Population genetics of overwintering  
718 monarch butterflies, *Danaus plexippus* (Linnaeus), from Central Mexico Inferred from  
719 mitochondrial DNA and microsatellite markers. *Journal of Heredity* 108:163–175.
- 720 Pierce, A.A., M.P. Zalucki, M. Bangura, M. Udawatta, M.R. Kronforst, S. Altizer, J.F.  
721 Haeger, and J. C. de Roode. 2014. Serial founder effects and genetic differentiation  
722 during worldwide range expansion of monarch butterflies. *Proceedings of the Royal*  
723 *Society B: Biological Sciences* 281:20142230–20142230.
- 724 Pocius, V.M., S. Cibotti, S. Ray, O. Ankoma-Darko, N.B. McCartney, R.J. Schilder, and J.G.  
725 Ali. 2022. Impacts of larval host plant species on dispersal traits and free-flight  
726 energetics of adult butterflies. *Communications Biology* 5:1–9.

- 727 Price, T.D., A. Qvarnström, and D.E. Irwin. 2003. The role of phenotypic plasticity in driving  
728 genetic evolution. *Proceedings of the Royal Society of London. Series B: Biological*  
729 *Sciences* 270:1433–1440. Royal Society.
- 730 R Core Team. 2013. R: A language and environment for statistical computing. Vienna,  
731 Austria.
- 732 Rankin, M.A., and J.C.A. Burchsted. 1992. The cost of migration in insects. *Annual Review*  
733 *of Entomology* 37:533–559.
- 734 Reppert, S.M., and J.C. de Roode. 2018. Demystifying monarch butterfly migration. *Current*  
735 *Biology* 28:R1009–R1022.
- 736 Rohlf, F.J. 2006. tpsDig. Department of Ecology and Evolution, State University of New  
737 York at Stony Brook.
- 738 Rueden, C.T., J. Schindelin, M.C. Hiner, B.E. DeZonia, A.E. Walter, E.T. Arena, and K. W.  
739 Eliceiri. 2017. ImageJ2: ImageJ for the next generation of scientific image data. *BMC*  
740 *Bioinformatics* 18:529.
- 741 Satterfield, D.A., and A.K. Davis. 2014. Variation in wing characteristics of monarch  
742 butterflies during migration: Earlier migrants have redder and more elongated wings.  
743 *Animal Migration* 2:1-7.
- 744 Scheiner, S.M. 1993. Genetics and evolution of phenotypic plasticity. *Annual Review of*  
745 *Ecology and Systematics* 24:35–68.
- 746 Schindelin, J., I. Arganda-Carreras, E. Frise, V. Kaynig, M. Longair, T. Pietzsch, S. Preibisch,  
747 C. Rueden, S. Saalfeld, B. Schmid, J.-Y. Tinevez, D.J. White, V. Hartenstein, K.  
748 Eliceiri, P. Tomancak, and A. Cardona. 2012. Fiji: an open-source platform for  
749 biological-image analysis. *Nature Methods* 9:676–682.
- 750 Schleicherová, D., G. Sella, and M.C. Lorenzi. 2013. Do stable environments select against  
751 phenotypic plasticity in hermaphroditic sex allocation? *Italian Journal of Zoology*  
752 80:358–363. Taylor & Francis.
- 753 Schnorrer, F., C. Schönbauer, C.C.H. Langer, G. Dietzl, M. Novatchkova, K. Schernhuber, M.  
754 Fellner, A. Azaryan, M. Radolf, A. Stark, K. Keleman, and B.J. Dickson. 2010.  
755 Systematic genetic analysis of muscle morphogenesis and function in *Drosophila*.  
756 *Nature* 464:287–291.

- 757 Schroeder H., A. Majewska, and S. Alitzer. 2020. Monarch butterflies reared under autumn-  
758 like conditions have more efficient flight and lower post-flight metabolism. *Ecological*  
759 *Entomology*. 2020; 45:562–572.
- 760 Senar, J. C., J. Lleonart, and N.B. Metcalfe. 1994. Wing-shape variation between resident and  
761 transient wintering siskins *carduelis spinus*. *Journal of Avian Biology* 25:50–54.
- 762 Sgrò, C. M., J.S. Terblanche, and A.A. Hoffmann. 2016. What Can Plasticity Contribute to  
763 Insect Responses to Climate Change? *Annual Review of Entomology* 61:433–451.
- 764 Swaddle, J.P., and M.S. Witter. 1998. Cluttered habitats reduce wing asymmetry and  
765 increase flight performance in European starlings. *Behavioral Ecology and*  
766 *Sociobiology* 42:281–287. Springer.
- 767 Tanaka, S., and T. Okuda. 1996. Life cycles, diapause and developmental characteristics in  
768 subtropical locusts, *Nomadacris succincta* and *N. japonica* (Orthoptera: Acrididae).  
769 *Japanese Journal of Entomology* 64:189–201.
- 770 Tenger-Trolander, A., and M.R. Kronforst. 2020. Migration behaviour of commercial  
771 monarchs reared outdoors and wild-derived monarchs reared indoors. *Proceedings of*  
772 *the Royal Society B; Biological Sciences* 287:20201326.
- 773 Tenger-Trolander, A., W. Lu, M. Noyes, and M.R. Kronforst. 2019. Contemporary loss of  
774 migration in monarch butterflies. *Proceedings of the National Academy of Sciences of*  
775 *the United States of America* 116:14671–14676.
- 776 Van Tienderen, P.H. 1991. Evolution of generalists and specialists in spatially heterogeneous  
777 environments. *Evolution* 45:1317–1331.
- 778 Van der Burg, K.R.L., J.J. Lewis, B.J. Brack, R.A. Fandino, A. Mazo-Vargas, and R.D. Reed.  
779 2020. Genomic architecture of a genetically assimilated seasonal color pattern *Science*  
780 370:721–725.
- 781 Van Dyken, D., and M.J. Wade. 2010. The genetic signature of conditional expression.  
782 *Genetics* 184:557–570.
- 783 Via, S., and R. Lande. 1985. Genotype-Environment interaction and the evolution of  
784 phenotypic plasticity. *Evolution* 39: 505–522.
- 785 Via, S., and R. Lande. 1987. Evolution of genetic variability in a spatially heterogeneous  
786 environment: effects of genotype–environment interaction. *Genetics Research* 49:147–  
787 156. Cambridge University Press.

- 788 Waddington, C.H. 1961. Genetic assimilation. Pp. 257–293 in E. W. Caspari and J. M.  
789 Thoday, eds. *Advances in Genetics*. Academic Press.
- 790 Wan, J.S.H., F. Fazlioglu, and S.P. Bonser. 2018. Loss of plasticity in life-history strategy  
791 associated with secondary invasion into stressful environments in invasive narrowleaf  
792 plantain (*Plantago lanceolata*). *Austral Ecology* 43:752–762.
- 793 Wang, Z.J. 2004. The role of drag in insect hovering. *J Exp Biol* 207:4147–4155.
- 794 Warton, D.I., I.J. Wright, D.S. Falster, and M. Westoby. 2006. Bivariate line-fitting methods  
795 for allometry. *Biol. Rev. Camb. Philos. Soc.* 81:259–291.
- 796 Williams, C.M., G.J. Ragland, G. Betini, L.B. Buckley, Z.A. Cheviron, K. Donohue, J.  
797 Hereford, M.M. Humphries, S. Lisovski, K.E. Marshall, P.S. Schmidt, K.S. Sheldon, Ø.  
798 Varpe, and M.E. Visser. 2017. Understanding evolutionary impacts of seasonality: an  
799 introduction to the symposium. *Integrative and Comparative Biology* 57:921–  
800 933. Winkler, H., and B. Leisler. 1992. On the ecomorphology of migrants. *Ibis* 134:21–  
801 28.
- 802 Wilsterman, K., M.A. Ballinger, and C.M. Williams. 2021. A unifying, eco-physiological  
803 framework for animal dormancy. *Functional Ecology* 35:11–31.
- 804 Whitlock, M.C. 1996. The red queen beats the jack-of-all-trades: the limitations on the  
805 evolution of phenotypic plasticity and niche breadth. *The American Naturalist* 148:S65–  
806 S77.
- 807 Zhen, Y., and M.C. Ungerer. 2008. Clinal variation in freezing tolerance among natural  
808 accessions of *Arabidopsis thaliana*. *New Phytologist* 177:419–427.
- 809 Zhen, Y., P. Dhakal, and M.C. Ungerer. 2011. Fitness Benefits and Costs of Cold Acclimation  
810 in *Arabidopsis thaliana*. *The American Naturalist* 178:44–52. The University of Chicago  
811 Press.
- 812 Zera, A.J., J. Sall, and K. Grudzinski. 1997. Flight-muscle polymorphism in the cricket  
813 *Gryllus firmus*: Muscle characteristics and their influence on the evolution of  
814 flightlessness. *Physiological Zoology* 70:519–529.
- 815 Zhan, S., W. Zhang, K. Niitepõld, J. Hsu, J.F. Haeger, M.P. Zalucki, S. Altizer, J.C. de  
816 Roode, S.M. Reppert, and M.R. Kronforst. 2014. The genetics of monarch butterfly  
817 migration and warning colouration. *Nature* 514:317–321.



- 818 Zhu, H., A. Casselman, and S.M. Reppert. 2008. Chasing migration genes: A brain expressed  
819 sequence tag resource for summer and migratory monarch butterflies (*Danaus*  
820 *plexippus*). PLoS ONE 3: e1345.
- 821 Zhu, H., R.J. Gegear, A. Casselman, S. Kanginakudru, and S.M. Reppert. 2009. Defining  
822 behavioral and molecular differences between summer and migratory monarch  
823 butterflies. BMC Biology 7:14.
